# Supplementary material
Source: PubMed Central journal article supplement (PMC8752031)

### CD38

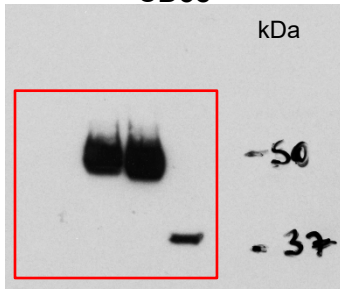

### tubulin

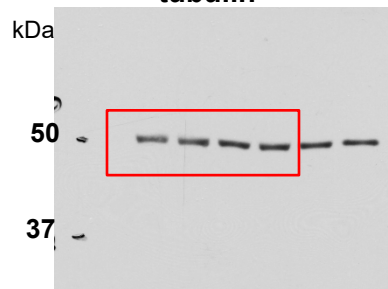

Supplement: NIHMS1628383-supplement-1628383_Source_Dat_Ext_Dat_Fig_6.pdf [file NIHMS1628383-supplement-1628383_Source_Dat_Ext_Dat_Fig_6.pdf]

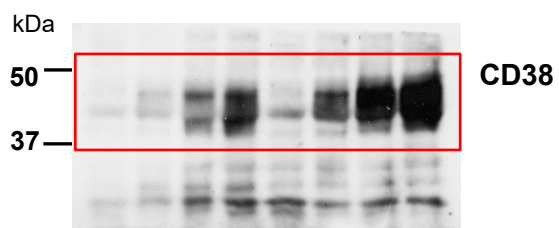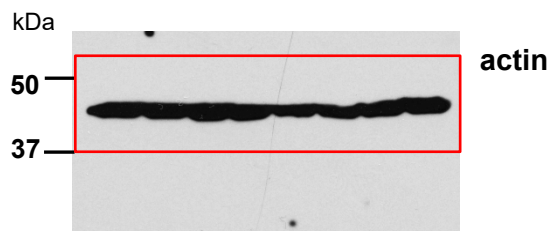

Supplement: NIHMS1628383-supplement-1628383_Source_Dat_Fig_1.pdf [file NIHMS1628383-supplement-1628383_Source_Dat_Fig_1.pdf]

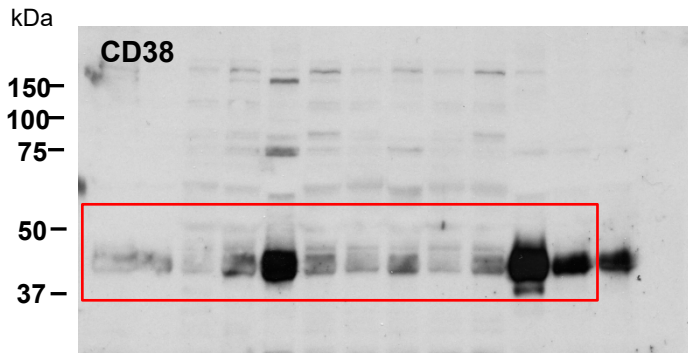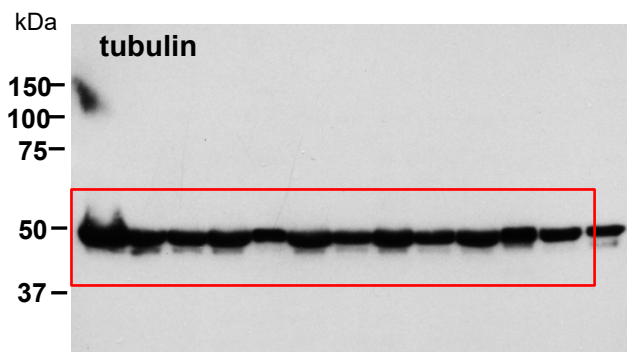

Supplement: NIHMS1628383-supplement-1628383_Source_Dat_Fig_5.pdf [file NIHMS1628383-supplement-1628383_Source_Dat_Fig_5.pdf]

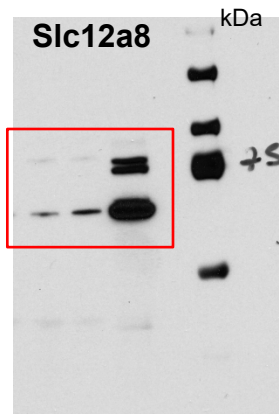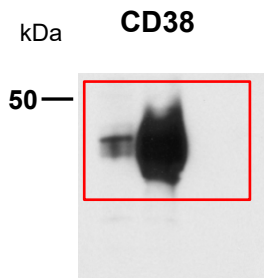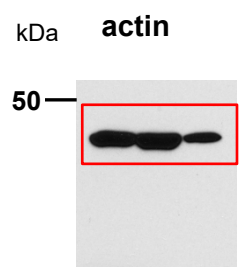

Supplement: NIHMS1628383-supplement-1628383_Source_Dat_Fig_7.pdf [file NIHMS1628383-supplement-1628383_Source_Dat_Fig_7.pdf]
